# Supplementary material
Source: Springer Nature journal article supplement (https://www.springermedizin.de/resource/supplementary/13256_2011_2091_MOESM3_ESM.pdf/9648984)

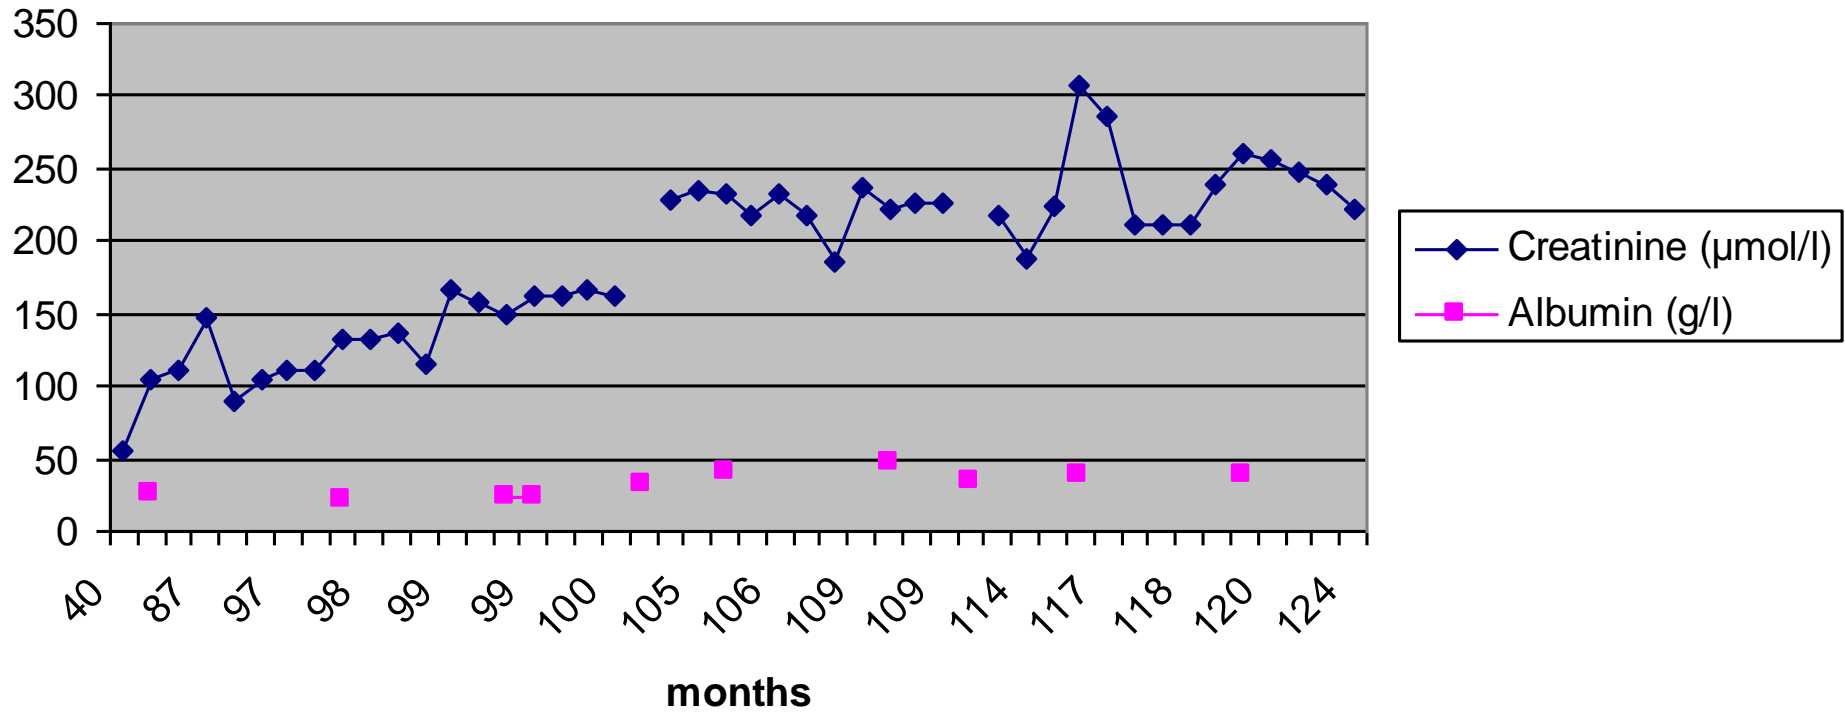

Prednisolone  
 Methylprednisolone  
 Mycophenolate mofetil  
 Rituximab  
 Plasmapheresis

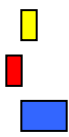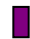

\* \* \*

Supplement: MOESM3 [file 9648984]
